# Supplementary material
Source: Royal Society of Chemistry journal article supplement (doi:10.1039/d6ta02422j)
Supplement: d6ta02422j1.pdf [file d6ta02422j1.pdf]

*Electronic Supplementary Information*

## ***Design of Binder-Free Slurry Electrodes for Lithium-Ion Batteries via Identification of Electronic and Ionic Transport Networks***

*Keigo Suzuki, Yoshiki Yokoyama, Hayato Ikeda, and Shiro Seki\**

Graduate School of Applied Chemistry and Chemical Engineering, School of Advanced Engineering,  
Kogakuin University, 2665-1 Nakano-machi, Hachioji, Tokyo 192-0015, Japan

\*To whom correspondence should be addressed, E-mail: shiro-seki@cc.kogakuin.ac.jp (Dr. S. Seki)

Fax: +81-42-628-4568; Tel.: +81-42-628-4568

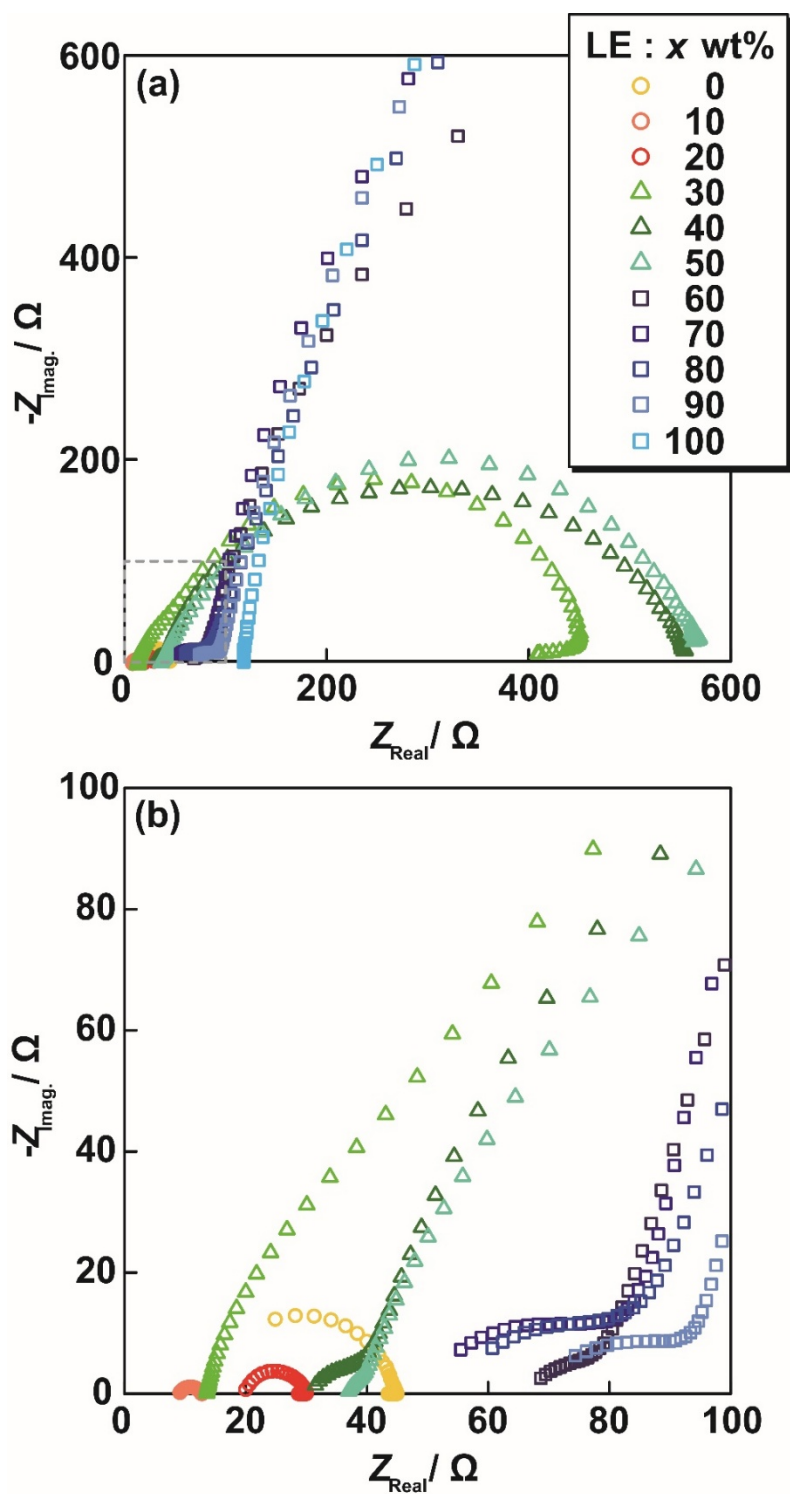

**Figure S1.** Nyquist plots for binder-free slurries (BFSs) for all electrode compositions, expressed as [LFP+AB+VGCF : LE = 100-x : x, where x = 0-100 wt%), with a fixed ratio of LFP : AB : VGCF = 83 : 12 : 5 (wt%), measured with an AC amplitude of 10 mV at 303 K.

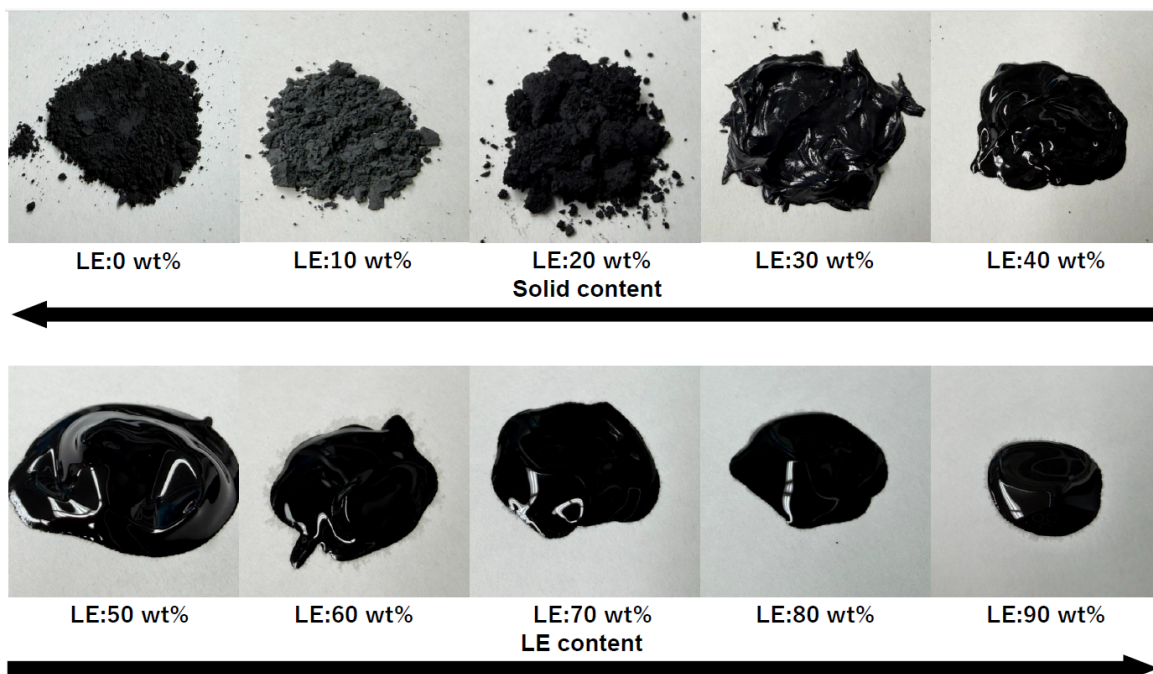

**Figure S2.** Morphology of binder-free slurries (BFSs) with different electrode compositions.

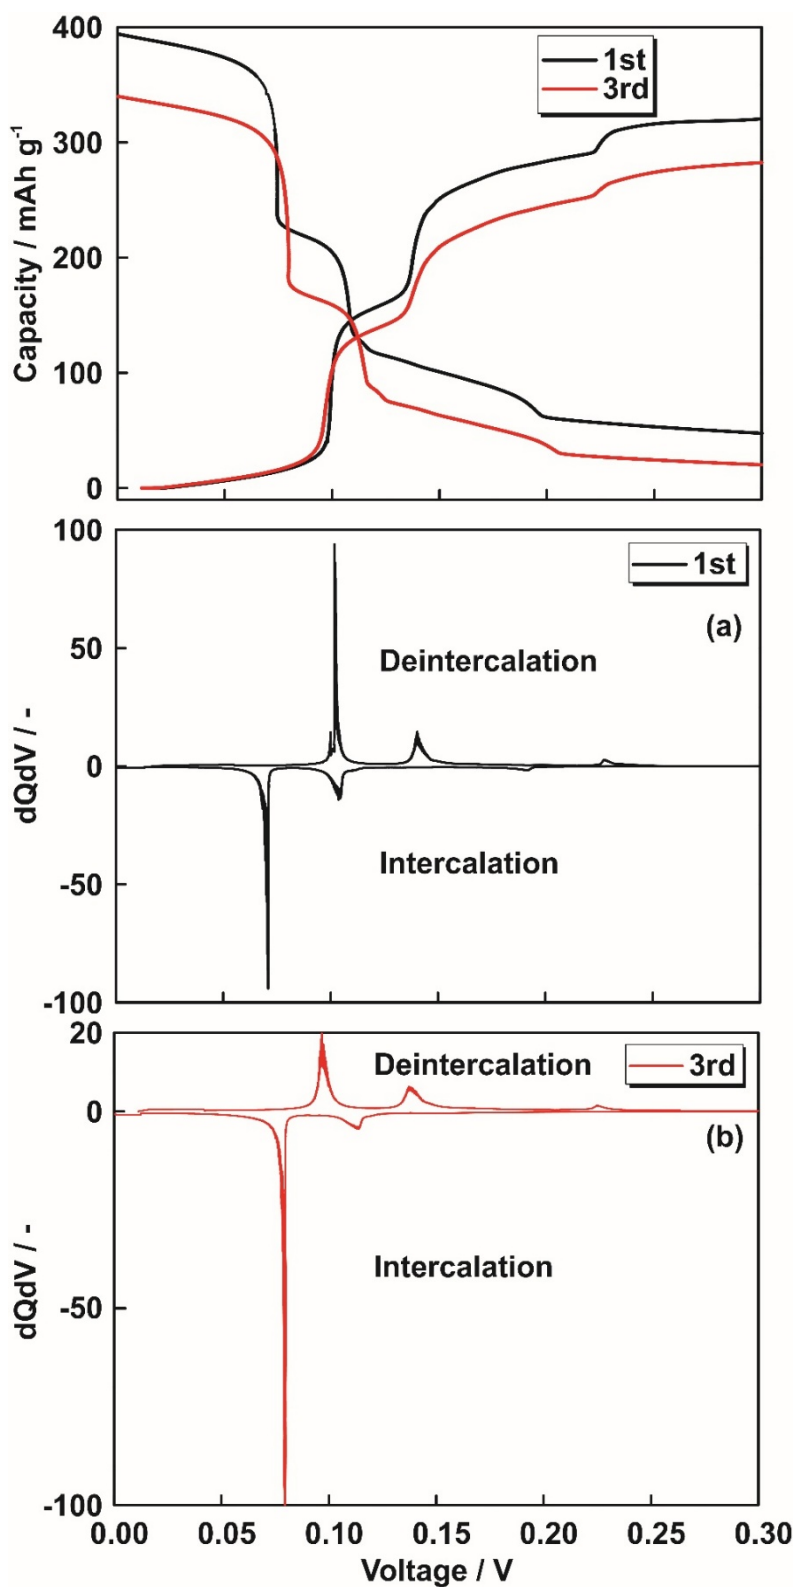

**Fig. S3** V-dQ/dV curves of negative binder-free half-cells at 303 K: (a) 1st cycle using a carbon-coated Cu current collector, (b) 3rd cycle using a carbon-coated Cu current collector, (c) 1st cycle using a bare Cu current collector and (d) 3rd cycle using a bare Cu current collector.

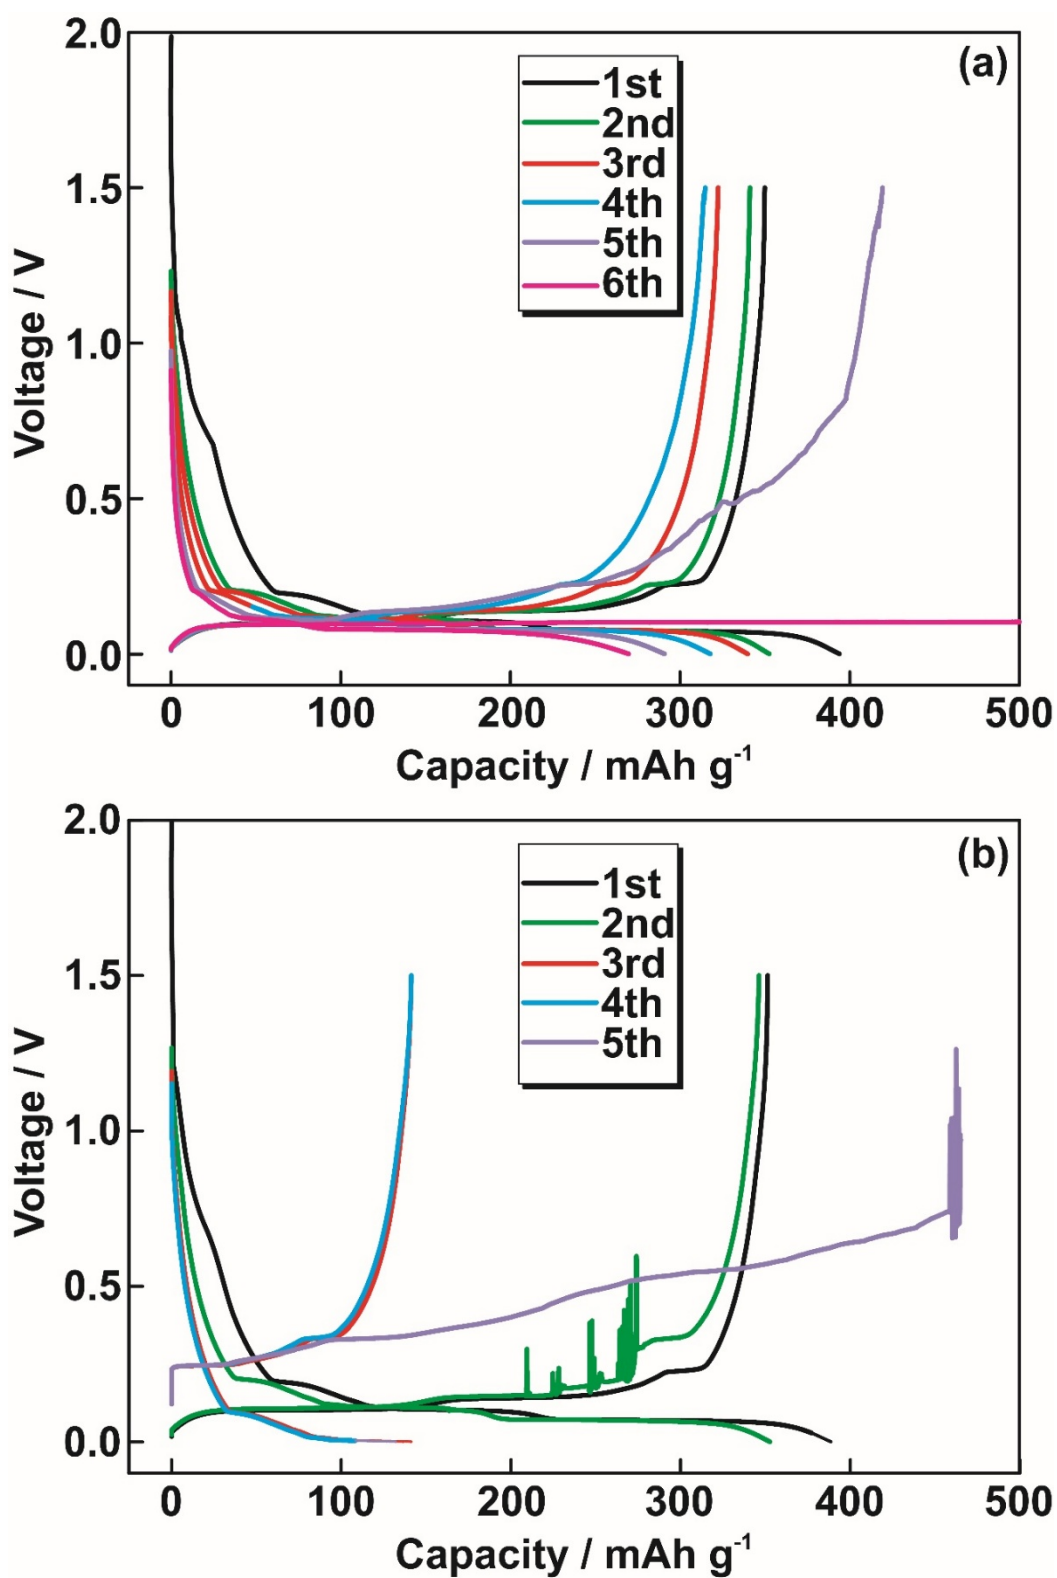

**Fig. S4.** Charge-discharge profiles of the [negative binder-free electrode | GPE | Li metal] half-cell at 303 K for all cycles using (a) a carbon-coated Cu current collector and (b) a bare Cu current collector.

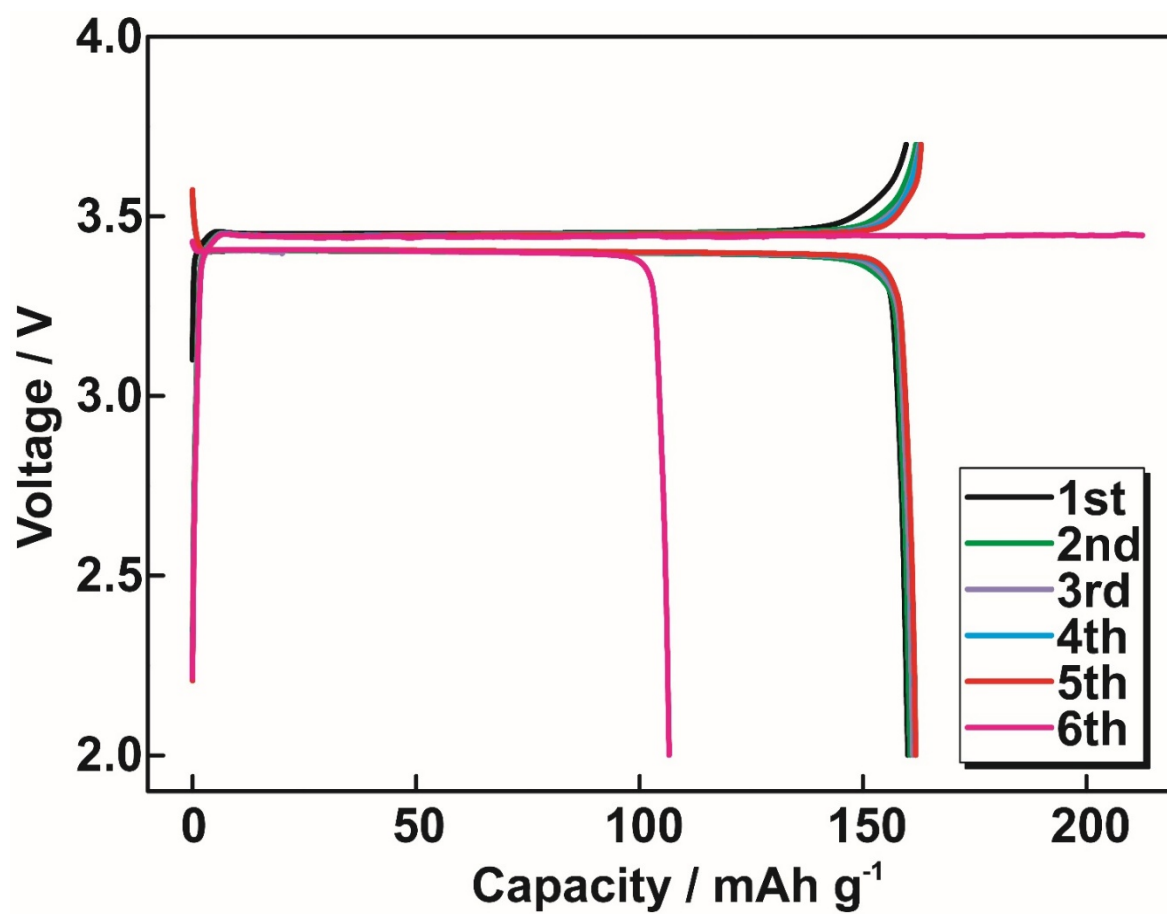

**Fig. S5.** Charge-discharge profiles of the [positive binder-free electrode | GPE | Li metal] half-cell at 303 K for all cycles using a carbon-coated Al current collector.
